# Supplementary material for: A simplified lateral flow immunosensor for the assay of carcinoembryonic antigen in low-resource settings
Source: Royal Society of Chemistry journal article supplement (doi:10.1039/d4ay00381k), 2024-01-01
Supplement: d4ay00381k1.pdf [file d4ay00381k1.pdf]

## A simplified lateral flow immunosensor for the assay of carcinoembryonic antigen in low-resource settings

Ioanna Tsogka, Electra Mermiga, Varvara Pagkali, Christos Kokkinos and  
Anastasios Economou\*

*Department of Chemistry, National and Kapodistrian University of Athens,  
Panepistimiopolis 157 71, Greece*

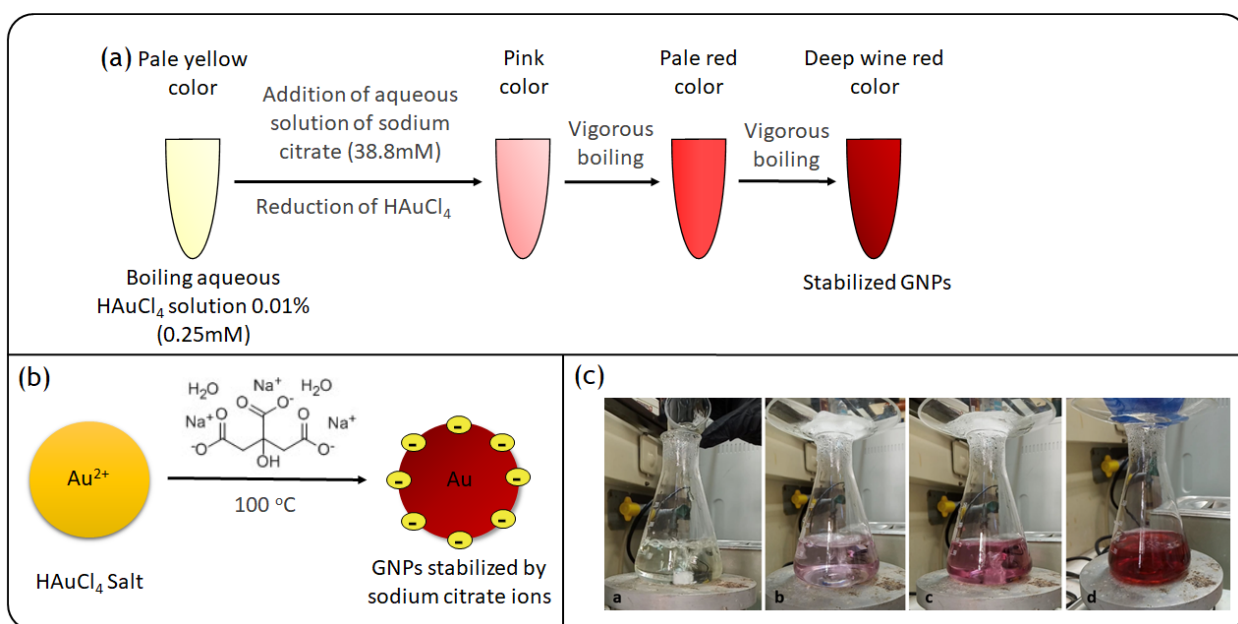

**Scheme S1.** (a) Schematic of the Turkevich method for GNPs synthesis. (b) Reduction of chloroauric acid with sodium citrate. (c) Photos showing the solution's gradual color change.

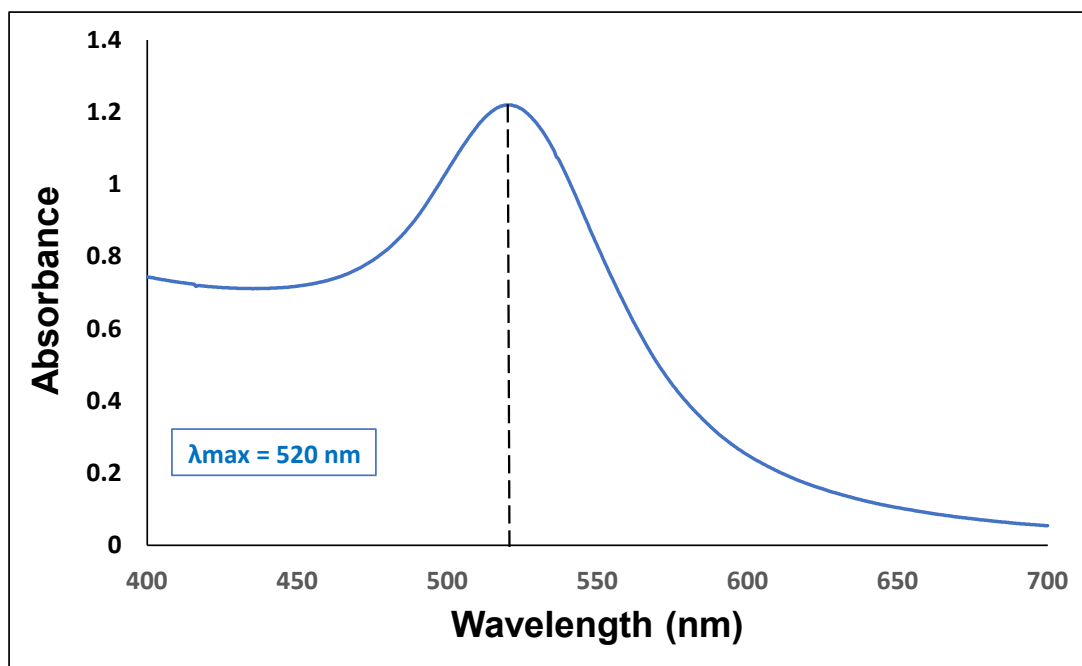

**Figure S1.** Absorption spectrum of GNPs using the modified Turkevich method.

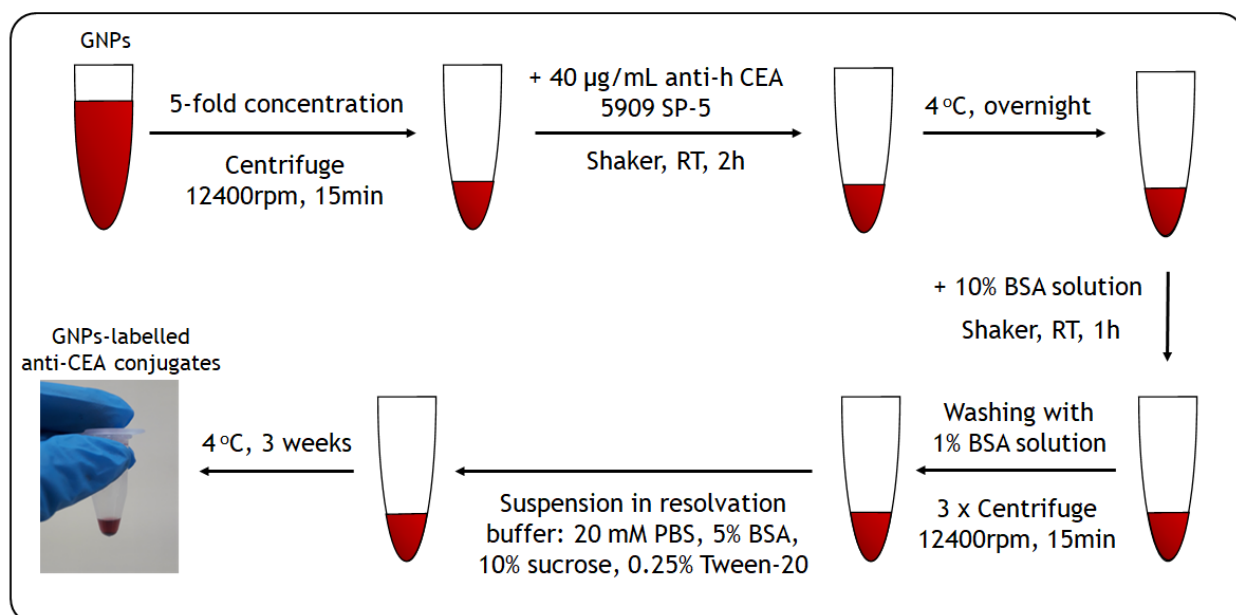

**Scheme S2.** Schematic of the synthesis of GNPs- labelled anti-CEA conjugate probes.

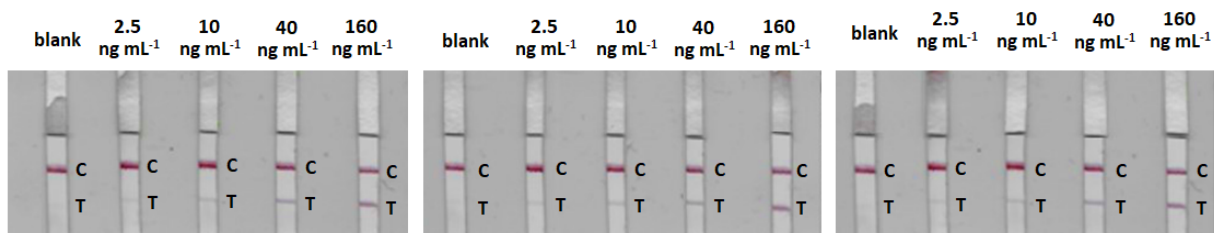

**Figure S2.** Images of strips for the triplicate assay of CEA in spiked serum diluted 1:1 with running buffer.

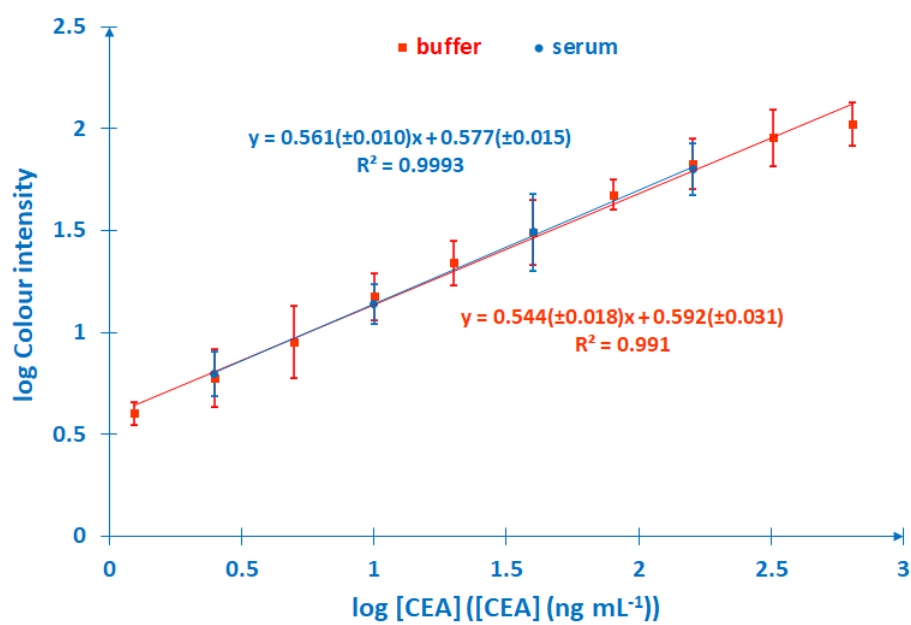

**Figure S3.** Comparison of calibration plots for CEA in running buffer and serum diluted 1:1 with running buffer.

**Table S1.** Comparison of the present lateral flow immunosensor with existing lateral flow immunosensors for CEA detection.

| Detection method (reading device)                 | Probes                                   | Ab at test line ( $\mu\text{g}$ ) | Ab at control line ( $\mu\text{g}$ ) | Linear range ( $\text{ng mL}^{-1}$ ) | Instrumental LOD ( $\text{ng mL}^{-1}$ ) | Visual LOD ( $\text{ng mL}^{-1}$ ) | Assay time (min) | Ref        |
|---------------------------------------------------|------------------------------------------|-----------------------------------|--------------------------------------|--------------------------------------|------------------------------------------|------------------------------------|------------------|------------|
| Colorimetric (home-based reader)                  | polydopamine-modified GNPs               | 0.1                               | 0 (PG used)                          | 0.05-50                              | N.R.                                     | 0.05                               | 15               | 37         |
| Colorimetric (smartphone)                         | GNPs (enhanced by Au(III) hydroxylamine) | 0.012                             | 0 (PG used)                          | 2-50                                 | 0.35                                     | 10                                 | 15               | 38         |
| Colorimetric (commercial reader)                  | GNPs                                     | 0.24                              | N.R.                                 | 2-50                                 | 5                                        | N.R.                               | 10               | 39         |
| Fluorescence (home-based reader)                  | QDs-QD nanobeads                         | 0.6                               | 0.3                                  | 1-50                                 | 0.0378                                   | N.R.                               | 15               | 40         |
| Fluorescence (commercial reader)                  | QD-doped polystyrene particles           | 0.48                              | 0.36                                 | 2.8-680                              | 0.35                                     | N.R.                               | 15               | 41         |
| Magnetic (commercial reader)                      | Magnetic nanobeads                       | 0.6                               | 0.3                                  | 1-100                                | 0.045                                    | 0.5                                | 30               | 42         |
| Colorimetric (N.R.)                               | MNPs-ssDNA-MNPs                          | N.R.                              | N.R.                                 | 0.25-1000                            | 0.25                                     | 0.25                               | 15               | 43         |
| Fluorescence (home-based reader)                  | QDs                                      | N.R.                              | N.R.                                 | 1-100                                | 0.049                                    | N.R.                               | 15               | 44         |
| Fluorescence (home-based reader)                  | QDs                                      | 0.8                               | 0.8                                  | 0.72-1000                            | 0.72                                     | N.R.                               | 25               | 45         |
| Fluorescence and colorimetric (commercial reader) | $\text{Fe}_3\text{O}_4$ nanospheres      | N.R.                              | N.R.                                 | 0.28-10                              | 0.01                                     | N.R.                               | 3                | 46         |
| Colorimetric (commercial scanner)                 | GNPs                                     | 0.125                             | 0.25                                 | 1.25-640                             | 0.625                                    |                                    | 15               | this study |

GNPs, gold nanoparticles; N.R., not reported; QDs, quantum dots; MNPs, magnetic nanoparticles; ssDNA, single-stranded DNA

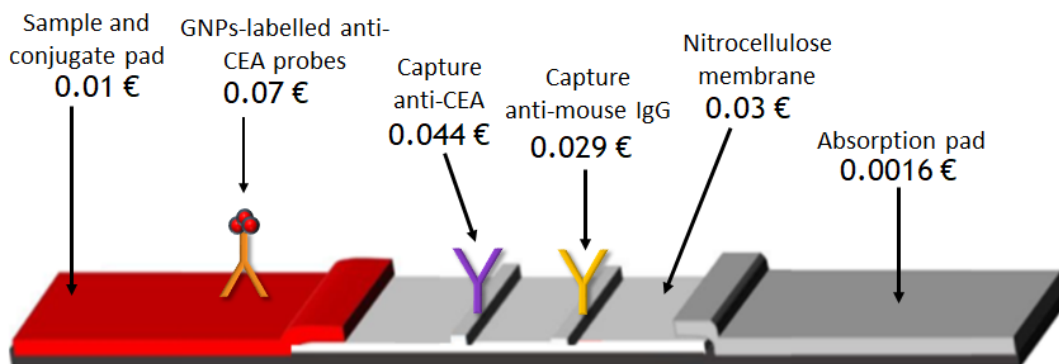

**Figure S4.** Cost analysis of the lateral flow strip in terms of materials.
